# Supplementary material for: A surface confined yttrium(iii) bis-phthalocyaninato complex: a colourful switch controlled by electrons
Source: Royal Society of Chemistry journal article supplement (doi:10.1039/c6sc00443a), 2016-01-01
Supplement: c6sc00443a1.pdf [file c6sc00443a1.pdf]

## SUPPORTING INFORMATION

### A SURFACE CONFINED YTTRIUM(III) BIS-PHTHALOCYANINATO COMPLEX: A COLOURFUL SWITCH CONTROLLED BY ELECTRONS

Isaac Alcon, Mathieu Gonidec, M. R. Ajayakumar, Marta Mas-Torrent\*, Jaume Veciana\*

---

#### TABLE OF CONTENTS

|                                                           |        |
|-----------------------------------------------------------|--------|
| Synthesis of Compound 1                                   | S2     |
| Synthesis of Compound 2                                   | S5     |
| Preparation of 2-SAM on ITO                               | S7     |
| Characterization of the 2-SAM                             | S8-S11 |
| X-ray Photo-electron Spectroscopy (XPS)                   | S8     |
| Time-of-Flight Secondary Ion Mass Spectrometry (ToF-SIMS) | S9     |
| Cyclic Voltammetry (CV)                                   | S10    |
| Time response of 2-SAM switch                             | S11    |
| Stability of 2-SAM on ITO over time                       | S11    |

## SYNTHESIS OF COMPOUND 1

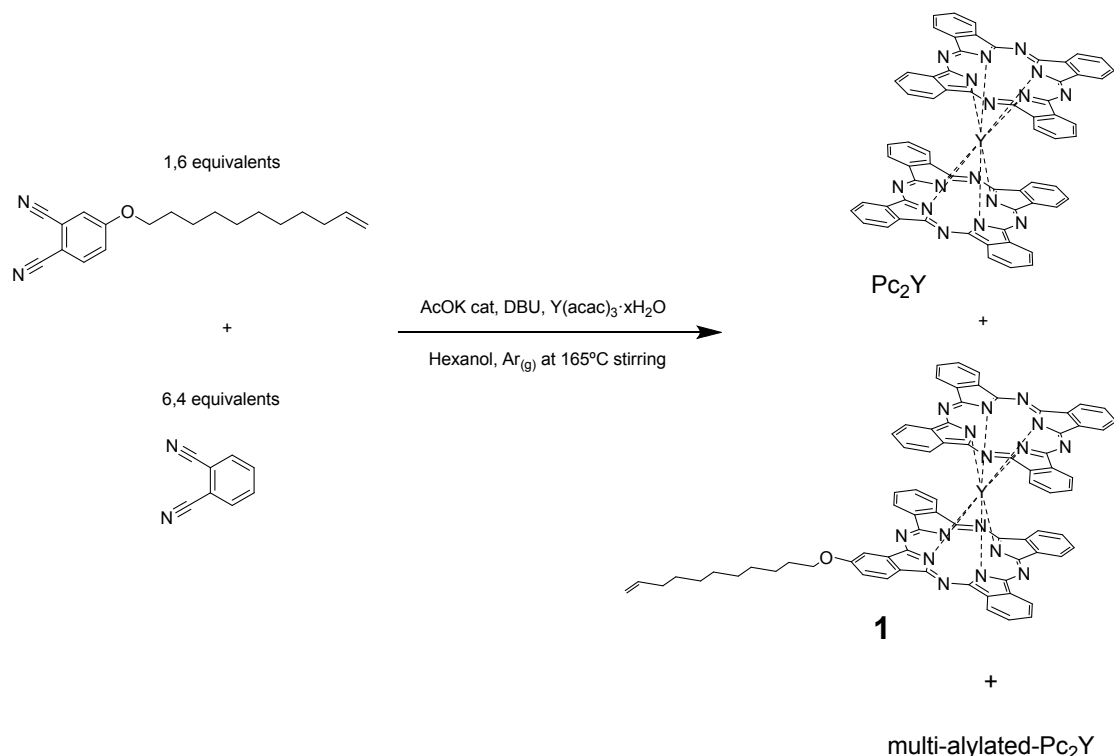

In a flame dried Schlenk tube 567 mg of phthalonitrile (4.43 mmol 6.34 eq.), 282 mg of acetylacetonate yttrium(III) (0.698 mmols 1 eq), 9 mg of potassium acetate (0.1 mmol catalytic amount) and 328 mg of 1,2-Benzenedicarbonitrile-4-(10-undecen-1-yloxy) (1.12 mmol 1.6 eq.) were carefully added. Then 10 mL of hexanol were added and the mixture was stirred for 5 min at room-temperature. After that time 420  $\mu$ L of diaza-bicycloundecene (DBU; strong organic base) were introduced and the solution was stirred at 165°C for around 14 h.

Then the solvent was removed by an air flux keeping the mixture at 165°C. The green solid was dissolved in 500 mL of dichloromethane and several volumes of acetic acid (50 mL) were added until the solution turned from blue to a greenish color. Several extractions with distilled water were done to remove DBU and other ionic and highly polar species from the organic medium. The organic fractions were dried with generous amounts of magnesium sulfate while stirring the solution. The inorganic solid was removed by filtration, the solvent was evaporated in a rotary evaporator and the remaining green precipitate was suspended in methanol. The suspension was filtered in vacuum through a NYLON filter. The green precipitate was dissolved in dichloromethane and eluted through a  $SiO_2$ -gel column. The 2<sup>nd</sup> fraction of this column (green color) was passed through a size-exclusion chromatography column a couple of times until the mono-alkylated-DD(Y) complex (**1**) was completely separated from the firstly eluted non-alkylated complex ( $Pc_2Y$ ) and the multi-alkylated double-decker species, which corresponded to the later eluted fractions. Compound **1** was characterized by MALDI-TOF mass spectroscopy, thin layer chromatography, UV-Vis and IR-ATR spectroscopy and cyclic voltammetry. The final green compound **1** was obtained in a 12% yield (36 mg).

$Rf_1$  ( $SiO_2$  TLC, eluent =  $CHCl_3$ ) = 0.49

UV-Vis ( $\log(\epsilon)$ ): 663 (5.078), 633 (4.246), 600 (4.332), 576 (4.137), 457 (4.310), 343 (4.750), 320 (4.916) nm.

CV:  $E^{1/2}_{(0 \leftrightarrow +1)}$  0.266 V,  $E^{1/2}_{(0 \leftrightarrow -1)}$  -0.221 V

IR-ATR( $cm^{-1}$ ): 679, 697, 720, 737, 773, 810, 882, 1000, 1058, 1158

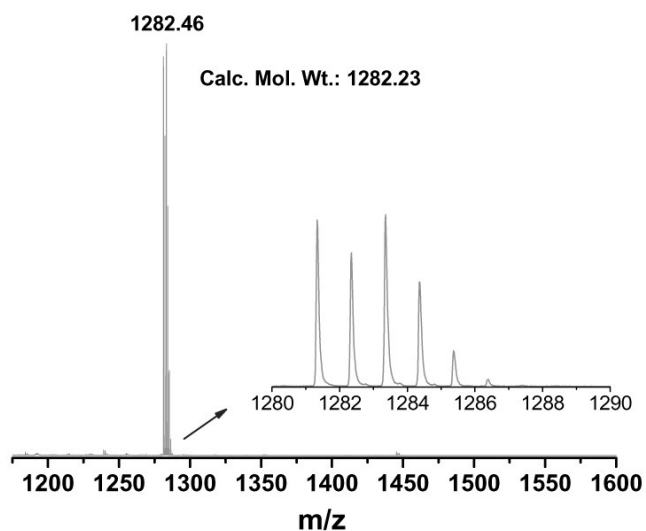

**Figure S1.** MALDI-ToF mass spectrum of **1** at negative mode.

ESR spectrum in  $\text{CH}_2\text{Cl}_2$  at 298 K: 1 signal at  $g = 2.00172$ .

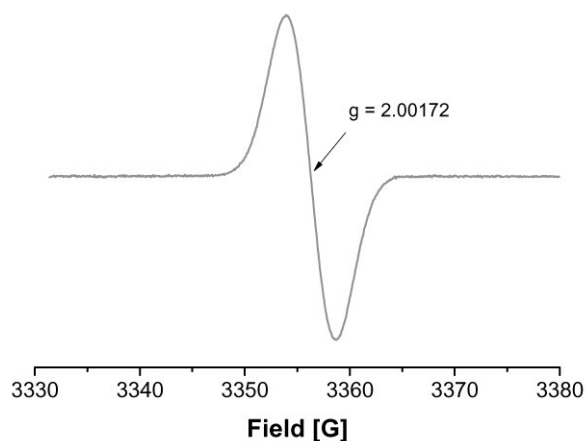

**Figure S2.** ESR spectrum of **1** in  $\text{CH}_2\text{Cl}_2$  at 298 K.

**Nuclear Magnetic Resonance (NMR) spectroscopy of Compound 1:**  $^1\text{H}$  NMR spectra were recorded on a Bruker 400 MHz spectrometer in  $\text{CD}_2\text{Cl}_2$  with TMS as a standard. Spin multiplicities are reported as singlet (s), and doublet (d), with coupling constants (J) given in Hz, or multiplet (m). The aromatic protons ( $\alpha$ ,  $\alpha'$ ,  $\alpha''$ ,  $\beta$  and  $\beta'$ ) of compound **1** are NMR silent due to the paramagnetic nature of the molecule, however, its vinylic and aliphatic protons gave respective signals.

$^1\text{H}$  NMR (400 MHz,  $\text{CD}_2\text{Cl}_2$ ):  $\delta = 5.99\text{-}5.87$  (m, 1 H;  $\text{—CH=}$ ),  $5.14\text{-}4.98$  (m, 2 H;  $\text{CH}_2\text{=}$ ),  $2.25\text{-}1.35$  (m, alkyl $\text{CH}_2$ ).

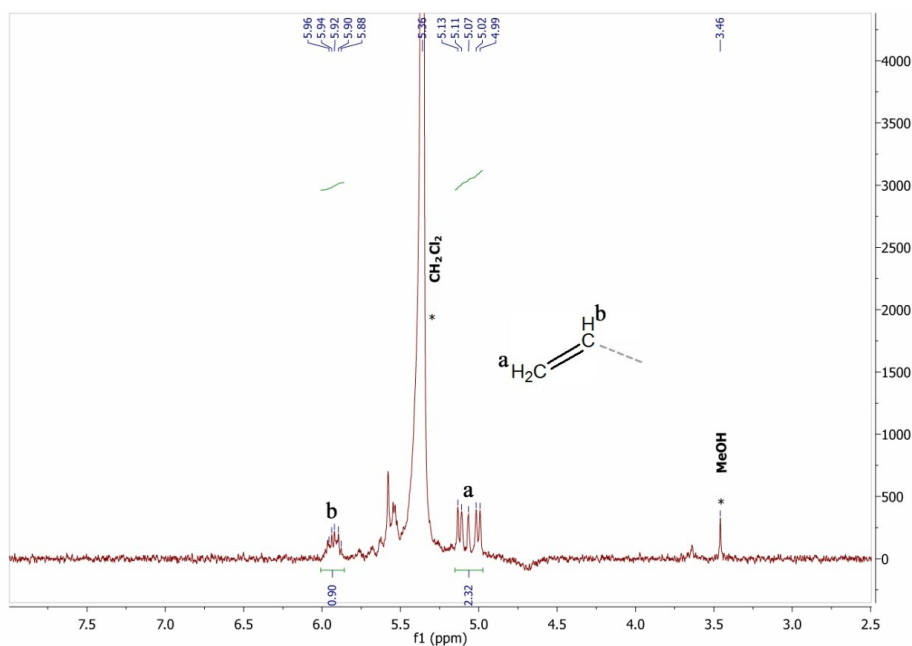

**Figure S3.**  $^1\text{H}$  NMR spectra of **1** in  $\text{CD}_2\text{Cl}_2$ . \* denotes the solvent impurity.

On treatment with hydrazine hydrate ( $\text{NH}_2\text{-NH}_2 \cdot x\text{H}_2\text{O}$ ), as a reducing agent, compound **1** gave well-resolved  $^1\text{H}$  NMR spectra. The disappearance of vinylic protons could be due to a possible reaction with  $\text{NH}_2\text{-NH}_2$ .<sup>[1-3]</sup>

$^1\text{H}$  NMR (400 MHz,  $\text{CD}_2\text{Cl}_2/\text{NH}_2\text{-NH}_2 \cdot x\text{H}_2\text{O}$ ):  $\delta$  = 8.99 (d,  $J$  = 3.2, 14 H; H- $\alpha$ ), 8.87 (d,  $J$  = 8.3, 1 H; H- $\alpha'$ ), 8.47 (s, 1 H; H- $\alpha''$ ), 8.20 (s, 14 H; H- $\beta$ ), 7.79 (d,  $J$  = 8.1, 1 H; H- $\beta'$ ), 2.35-1.34 (m, 18 H; alkyl $\text{CH}_2$ ).

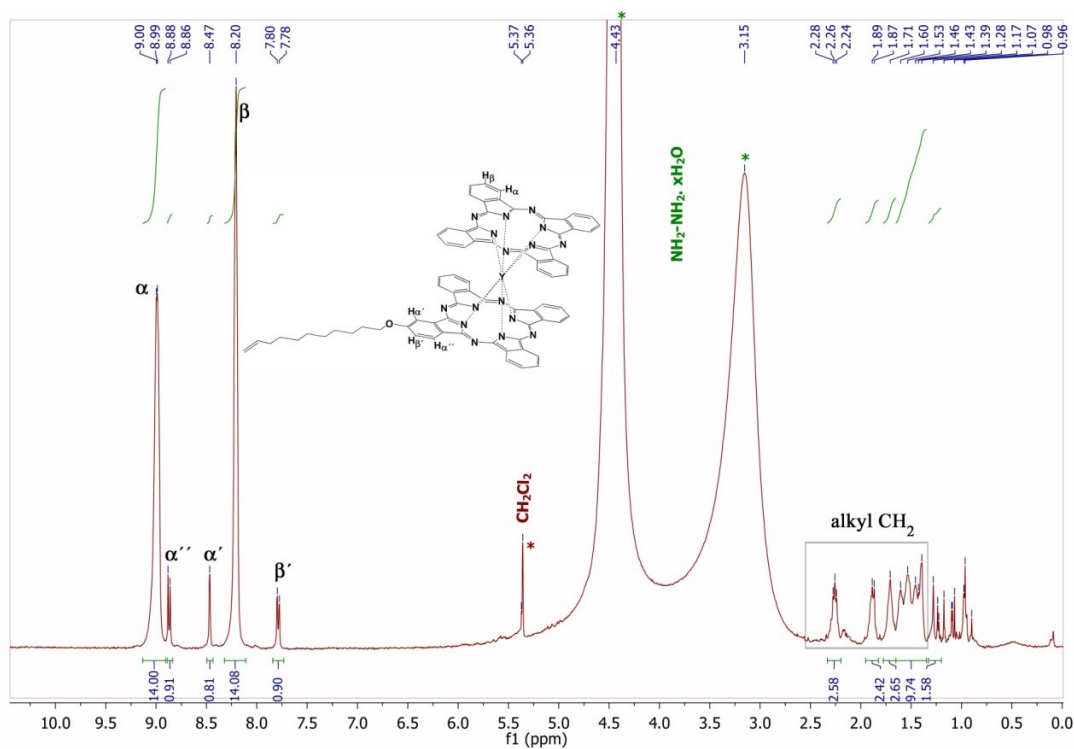

**Figure S5.**  $^1\text{H}$  NMR spectra of **1** recorded in  $\text{CD}_2\text{Cl}_2$  in presence of  $\text{NH}_2\text{-NH}_2 \cdot x\text{H}_2\text{O}$ . \* denotes the solvent impurity.

## SYNTHESIS OF COMPOUND 2

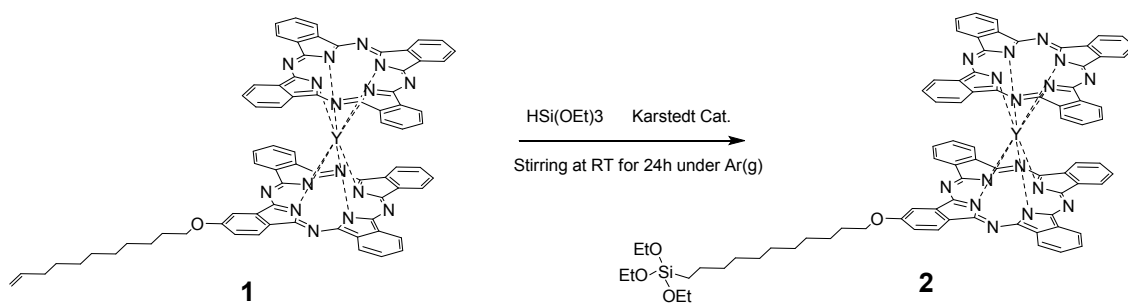

In a flame dried Schlenk under argon, 36 mg of compound **1** (28  $\mu\text{mol}$ , 1.0 eq.) were dissolved in 0.4 mL of triethoxysilane. 50  $\mu\text{l}$  of a 2% solution of Karstedt catalyst (Pt(o)-1,1,3,3-tetramethyldisiloxane complex) in xylene was added and the mixture was stirred at room temperature under argon for 24 h. The reaction progress was followed by thin layer chromatography ( $\text{SiO}_2$  on aluminum foil,  $\text{CHCl}_3$  as eluent). After around 24h the solvent  $\text{HSi}(\text{OEt})_3$  was removed by distillation in vacuum at  $72^\circ\text{C}$ . The green solid was dissolved in some milliliters of chloroform and eluted through a silica-gel chromatography column using chloroform as eluent. The second green collected fractions corresponded to compound **2**. Once evaporated the solvent in the rotary evaporator in vacuum, 14 mg of the title compound (yield = 35%) were obtained and kept under  $\text{Ar}(\text{g})$  atmosphere to avoid polymerization caused by atmospheric water. Compound **2** was characterized by MALDI-TOF mass spectroscopy, UV-vis and IR-ATR spectroscopies, thin layer chromatography and cyclic voltammetry.

$R_f$  ( $\text{SiO}_2$  TLC, eluent =  $\text{CHCl}_3$ ) = 0.30

IR( $\text{cm}^{-1}$ ): 680, 724, 774, 810, 884, 958, 1164, 1538

UV-Vis ( $\log(\epsilon)$ ): 663 (5.044), 633 (4.246), 600 (4.328), 576 (4.132), 457 (4.303), 343 (4.746), 320 (4.912) nm.

CV (vs  $\text{Ag}(\text{s})$ ):  $E^{1/2}_{(\text{o} \leftrightarrow +1)}$ : 0.37 V;  $E^{1/2}_{(\text{o} \leftrightarrow -1)}$ : -0.18 V

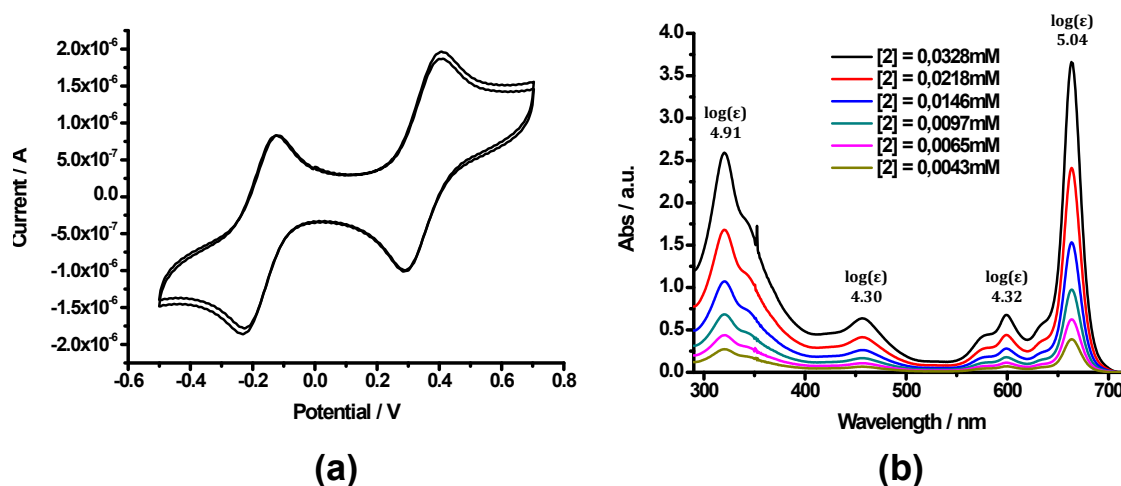

**Figure S6.** (a) Cyclic Voltammetry of compound **2**. The CV was performed in a 50 mM TBAPF<sub>6</sub> solution in 1,2-Dichlorobenzene at a scan rate of 0.1 V/s. Pt wires were used as WE and CE and a Ag one was used as RE. (b) UV-Vis spectra of compound **2** at different concentrations in HPLC toluene.

**MALDI-ToF Mass Spectroscopy (MW: 1446.5 g/mol)**

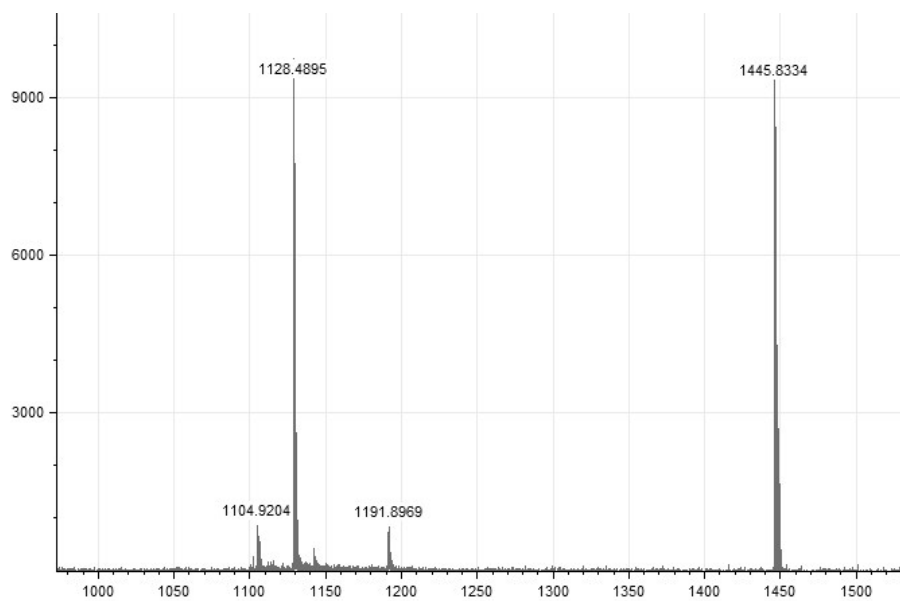

**Figure S7.** MALDI-TOF mass spectrum of **2** at negative mode.

## PREPARATION OF 2-SAM ON ITO

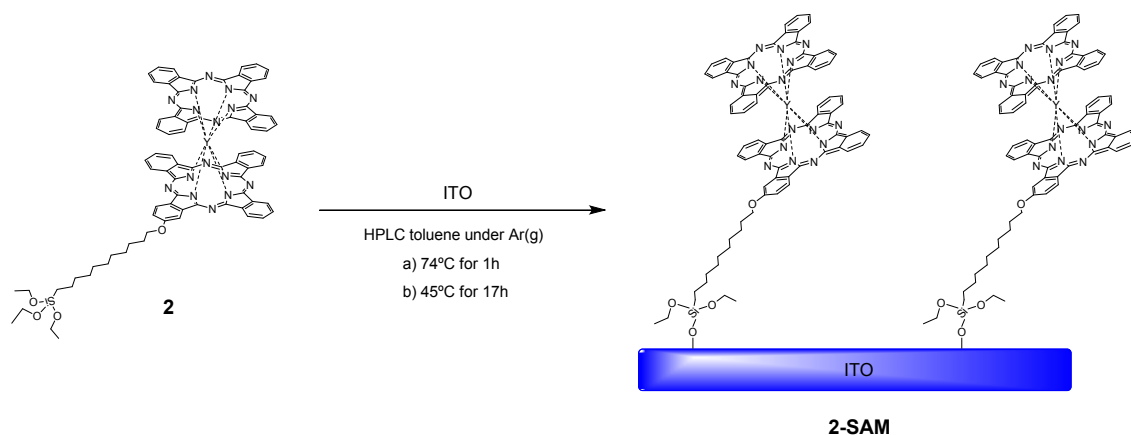

### Material Preparation

All the material employed for the SAM preparation was rinsed with DCM, acetone (both HPLC grade), distilled water and MilliQ water. Afterwards the material was placed in a plastic bucket filled with a 1% Hellmanex solution in MilliQ water for 3h. The bucket was emptied, filled with MilliQ water and left for 30 min. This was repeated twice. The material was removed, generously rinsed with MilliQ water and placed inside the oven at 60°C overnight.

### Degreasing ITO slides

The ITO slides were sonicated in HPLC DCM for 15 min. Then the slides were rinsed with the same solvent and dried with a  $N_{2(g)}$  stream. The entire process was repeated with HPLC acetone and ethanol.

### Activation of ITO and 2-SAM formation

The ITO slides were activated in an oxidant bath (MilliQ-water: $H_2O_2$  (50%): $NH_4OH$  (5N); 5:1:1) at 68°C – 75°C for 35 min.

The solution was degassed for 10 min more with an  $Ar_{(g)}$  stream and heated between 73 – 75°C for 1h in  $Ar$  atmosphere. After that time the temperature was decreased to 45°C and the solution was left at that temperature under inert conditions ( $Ar_{(g)}$  atmosphere) overnight. Next, the ITO slides were taken out of the solution, rinsed with HPLC toluene and dried with a  $N_{2(g)}$  stream.

Meanwhile, a solution of 1.7 mg of compound **2** in 3 mL of HPLC toluene was prepared. The solution was sonicated for 2 min and then was filtered through a 0.2  $\mu m$ -filter. Then, the solution was degassed by bubbling  $Ar_{(g)}$  for 10 min.

The ITO slides were taken out of the oxidant solution, rinsed with MilliQ water and HPLC acetone, dried with a  $N_{2(g)}$  stream and introduced rapidly into the toluene solution of **2**.

## CHARACTERIZATION OF THE 2-SAM

### X-Ray Photo-electron Spectroscopy (XPS)

| Element          | Beam Energy Peak/eV |
|------------------|---------------------|
| In <sub>3d</sub> | 444.45              |
| Sn <sub>3d</sub> | 486.78              |
| O <sub>1s</sub>  | 530.53              |
| C <sub>1s</sub>  | 285.25              |
| N <sub>1s</sub>  | 398.5               |
| Si <sub>2p</sub> | 102.15              |
| Y <sub>3d</sub>  | 158.36              |

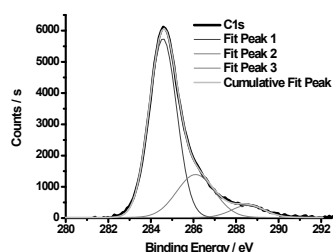

a) C<sub>1s</sub> Peak

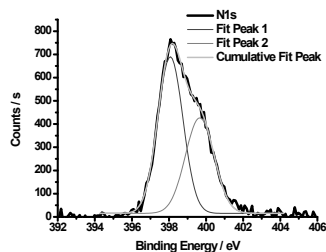

b) N<sub>1s</sub> Peak

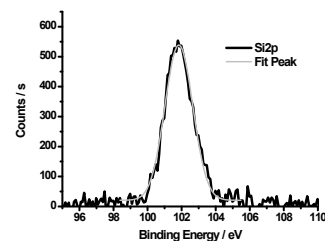

c) Si<sub>2p</sub> Peak

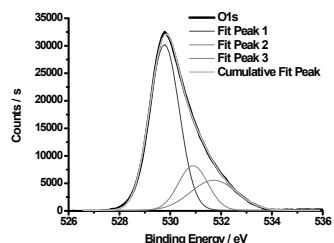

d) O<sub>1s</sub> Peak

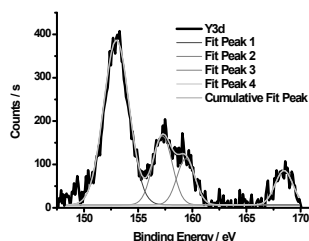

e) Y<sub>3d</sub> Peak

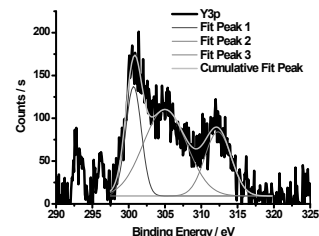

f) Y<sub>3p</sub> Peak

**Figure S8.** XPS peaks with the corresponding deconvolution analysis of C<sub>1s</sub>, N<sub>1s</sub>, Si<sub>2p</sub>, O<sub>1s</sub> and Y<sub>3d</sub> and 3p (a, b, c, d, e and f, respectively). Due to a possible overlap between the Y<sub>3d</sub> peak and the Si<sub>2s</sub> one, the energy of the Y<sub>3p</sub> orbital was also scanned.



## Time-of-Flight Secondary Ion Mass Spectrometry

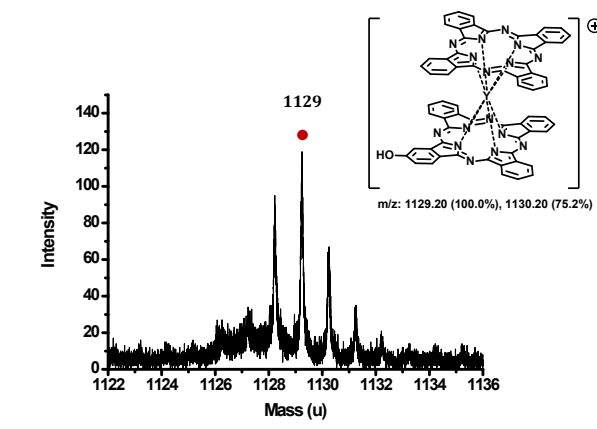

**Figure S9.** Zoomed ToF-SIMS spectrum of the z-SAM. The peak at  $m/z = 1129$  corresponds to the fragment depicted on the top-right side. This peak was also detected in MALDI-TOF mass spectroscopy measurements of compounds **1** and **2**.

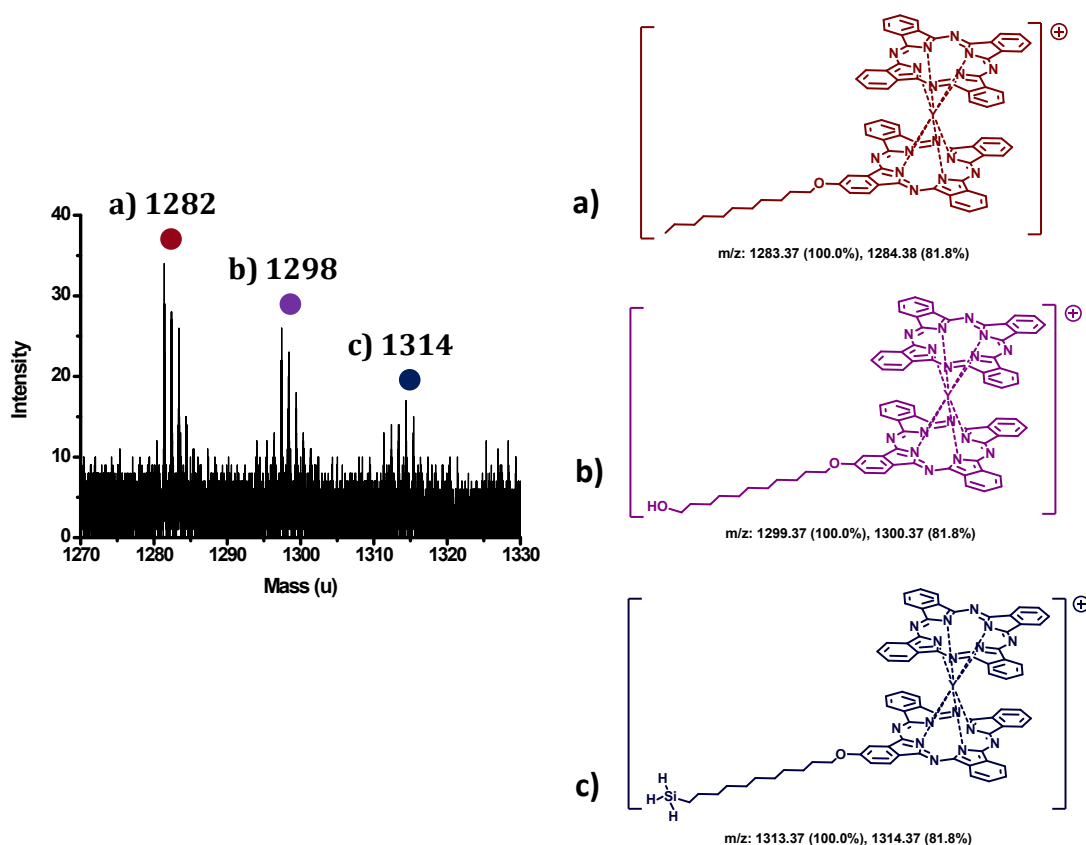

**Figure S10.** Zoomed ToF-SIMS spectrum of the z-SAM. The three highlighted peaks correspond to the three ionic structures showed in the right side (a, b and c).

## Cyclic Voltammetry

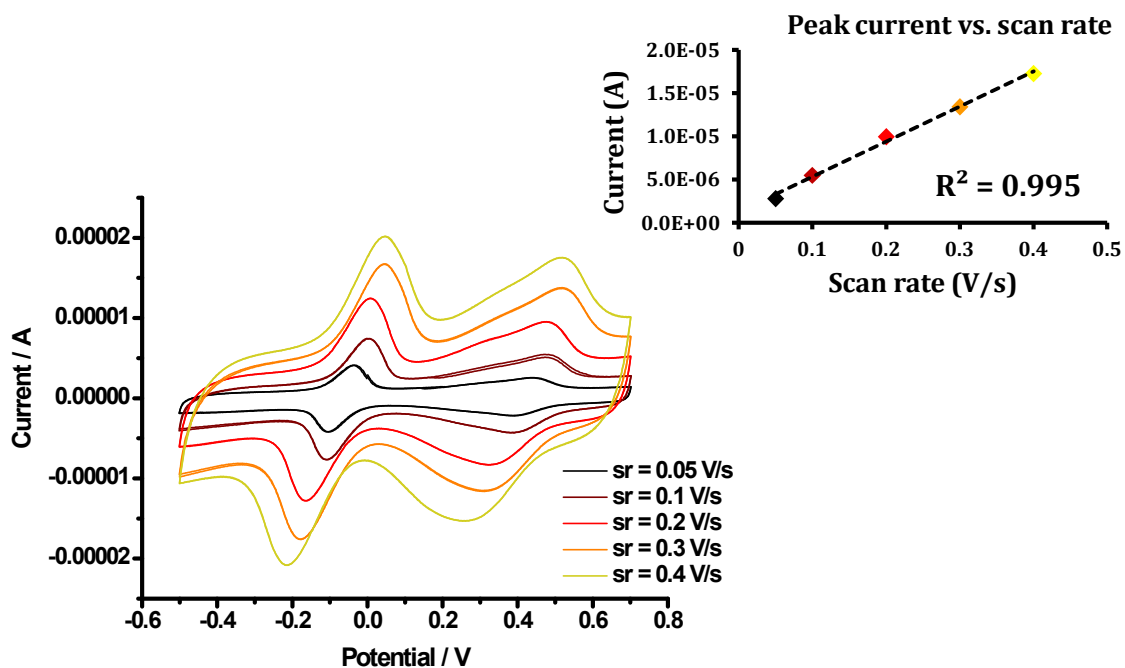

**Figure S11.** *Left*; 2-SAM cyclic voltammetry measurements performed at different scan rates. *Top-right*; Reduction peak current (y-axis) against scan rate used (x-axis). The 2-SAM functionalized ITO was used as WE, whereas Ag and Pt wires were used as reference and counter electrodes, respectively. A 50mM TBAPF<sub>6</sub> solution in 1,2-Dichlorobenzene was utilized as electrolyte.

## TIME RESPONSE OF THE 2-SAM SWITCH

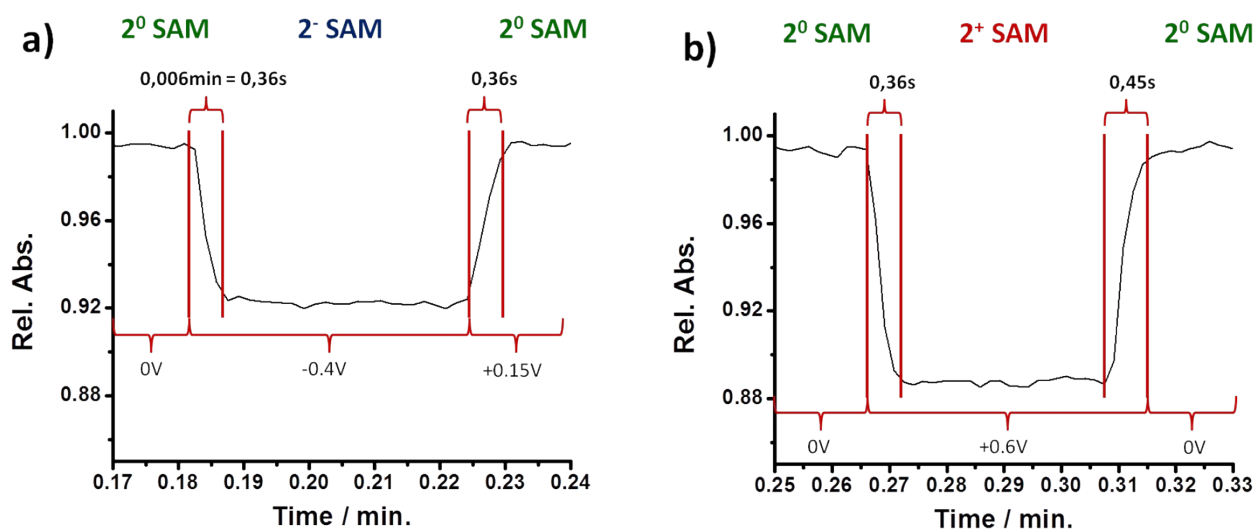

**Figure S12.** Time-response of the 2-SAM when electro-generating the 1e-reduced (a) and 1e-oxidized (b) states of the switch by applying the corresponding indicated potential pulses. In this case, the optical output was followed by the absorbance at  $\lambda = 663$  nm.

## STABILITY OF 2-SAM ON ITO OVER TIME

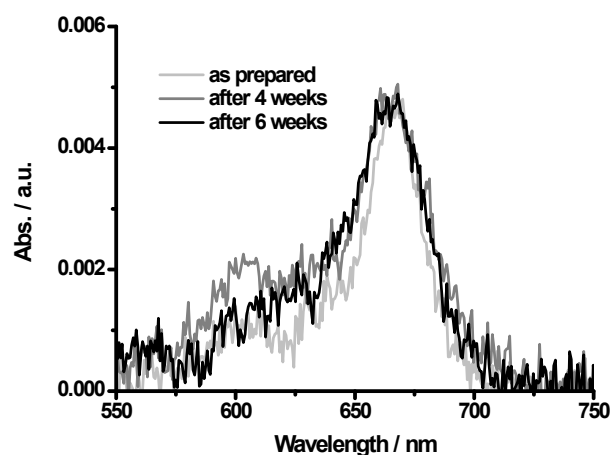

**Figure S13.** 2-SAM UV-Vis spectra measured during one month and a half. The 2-SAM was kept at room temperature and air during that time.

### References

- [1] M. Ahmed, R. Jackstell, A. M. Seayad, H. Klein and M. Beller, *Tetrahedron Lett.*, **2004**, *45*, 869–873.
- [2] Y. Imada, H. Iida, and T. Naot, *J. Am. Chem. Soc.*, **2005**, *127*, 14544–14545.
- [3] Y. Imada, T. Kitagawa, T. Ohno, H. Iida, and T. Naota, *Org. Lett.*, **2010**, *12*, 32–35.
